# Supplementary material for: Effect of ammonia on chemical vapour deposition and carbon nanotube nucleation mechanisms
Source: Royal Society of Chemistry journal article supplement (doi:10.1039/c6nr08222j), 2017-01-01
Supplement: c6nr08222j1.pdf [file c6nr08222j1.pdf]

## Supporting Information

### **The Dual Role of Ammonia during Chemical Vapour Deposition Carbon Nanotube Growth**

*Clothilde A. Eveleens<sup>a</sup> and Alister J. Page<sup>at</sup>*

<sup>a</sup>Newcastle Institute for Energy and Resources, The University of Newcastle, Callaghan,  
2308 NSW, Australia

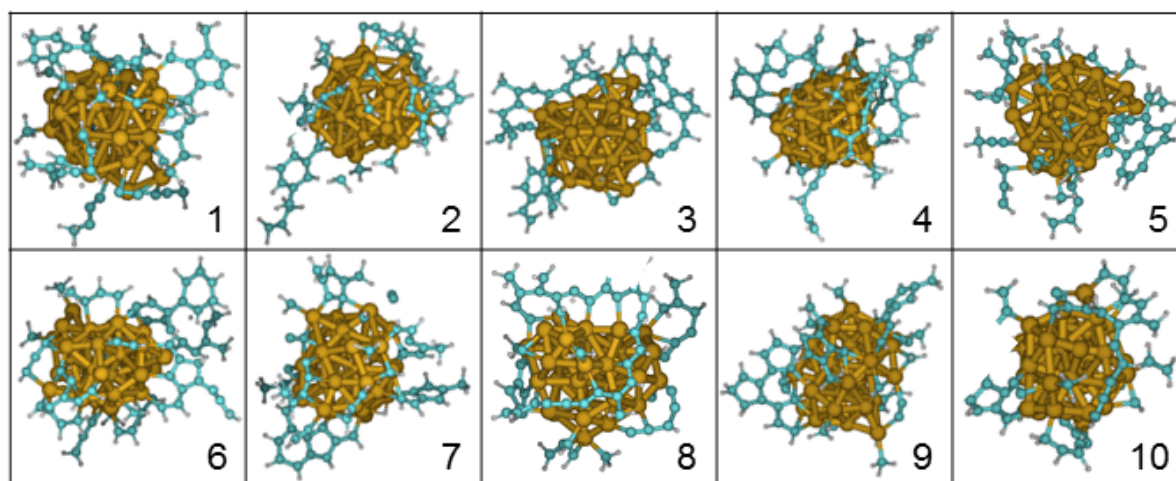

**Figure S1.** Final structure snapshots for trajectories 1-10 at 300 ps.

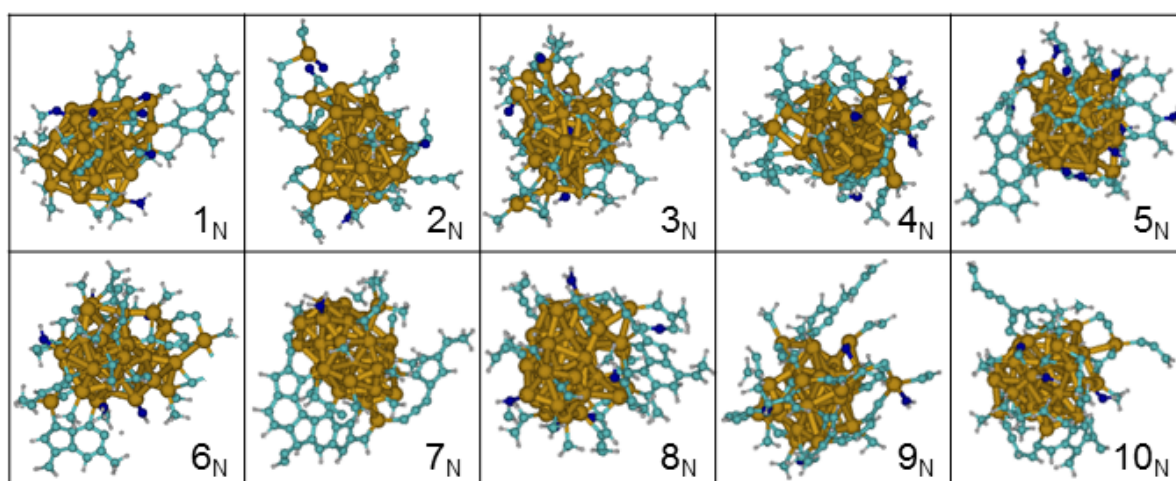

**Figure S2.** Final structure snapshots for trajectories  $1_N$ - $10_N$  at 300 ps.
